# Supplementary material for: Rationalizing the role of the anion in CO2 capture and conversion using imidazolium-based ionic liquid modified mesoporous silica
Source: Royal Society of Chemistry journal article supplement (doi:10.1039/c5ra07561k), 2015-01-01
Supplement: c5ra07561k1.pdf [file c5ra07561k1.pdf]

## Supplementary Material

### Rationalizing the role of the anion in CO<sub>2</sub> capture and conversion using imidazolium-based ionic liquid modified mesoporous silica

A.S. Aquino,<sup>a,b</sup> F.L. Bernard,<sup>a,b</sup> J.V. Borges<sup>b</sup>, L. Mafrá<sup>c</sup>, F. Dalla Vecchia<sup>b</sup>, M.O. Vieira,<sup>a,b</sup> Ligabue, R.<sup>a,b</sup>, Seferin, M.<sup>a,b</sup>, Vitaly V. Chaban,<sup>d</sup> E.J. Cabrita<sup>e</sup>, S. Einloft,<sup>a,b</sup>

**Table S1.** FTIR absorption bands of SILs (wavenumber, cm<sup>-1</sup>).

| <i>Assignments <math>\nu</math> (cm<sup>-1</sup>)</i> | <i>Samples*</i> |                  |                 |                 |
|-------------------------------------------------------|-----------------|------------------|-----------------|-----------------|
|                                                       | <i>ILCLM50</i>  | <i>ILTF2NM50</i> | <i>ILPF6M50</i> | <i>ILBF4M50</i> |
| $\nu$ Si-OH silanol                                   | 3364            | 3553             | 3325            | 3426            |
| $\nu$ C-H methyl and methylene                        | 2945            | 2934             | 2958            | 2959            |
|                                                       | 2840            | 2853             | 2927            | -----           |
| $\nu$ Si-O                                            | 1632            | 1631             | 1634            | 1634            |
| $\nu$ C-C and C-N imidazolium ring                    | 1570            | 1572             | 1577            | 1574            |
|                                                       | 1462            | 1460             | 1464            | 1461            |
| $\nu$ Si-O-Si siloxane                                | 1186            | 1182             | 1140            | 1134            |
| $\nu$ R <sub>3</sub> Si-O-SiR <sub>3</sub> disiloxane | 1070            | 1047             | 1060            | 1064            |
| $\nu$ Cl <sup>-</sup>                                 | 805             |                  |                 |                 |
| $\nu$ N-S                                             |                 | 837              |                 |                 |
| $\nu$ C-S                                             |                 | 791              |                 |                 |
| $\nu$ C-F                                             |                 | 742              |                 |                 |
| $\nu$ P-F                                             |                 |                  | 840             |                 |
| $\nu$ B-F                                             |                 |                  |                 | 1236            |
| $\delta_{as}$ B-F                                     |                 |                  |                 | 1062            |

\*Names of the samples indicate the nature of the anion (Tf<sub>2</sub>N<sup>-</sup>, PF<sub>6</sub><sup>-</sup> or BF<sub>4</sub><sup>-</sup> and the percentage of immobilized IL).

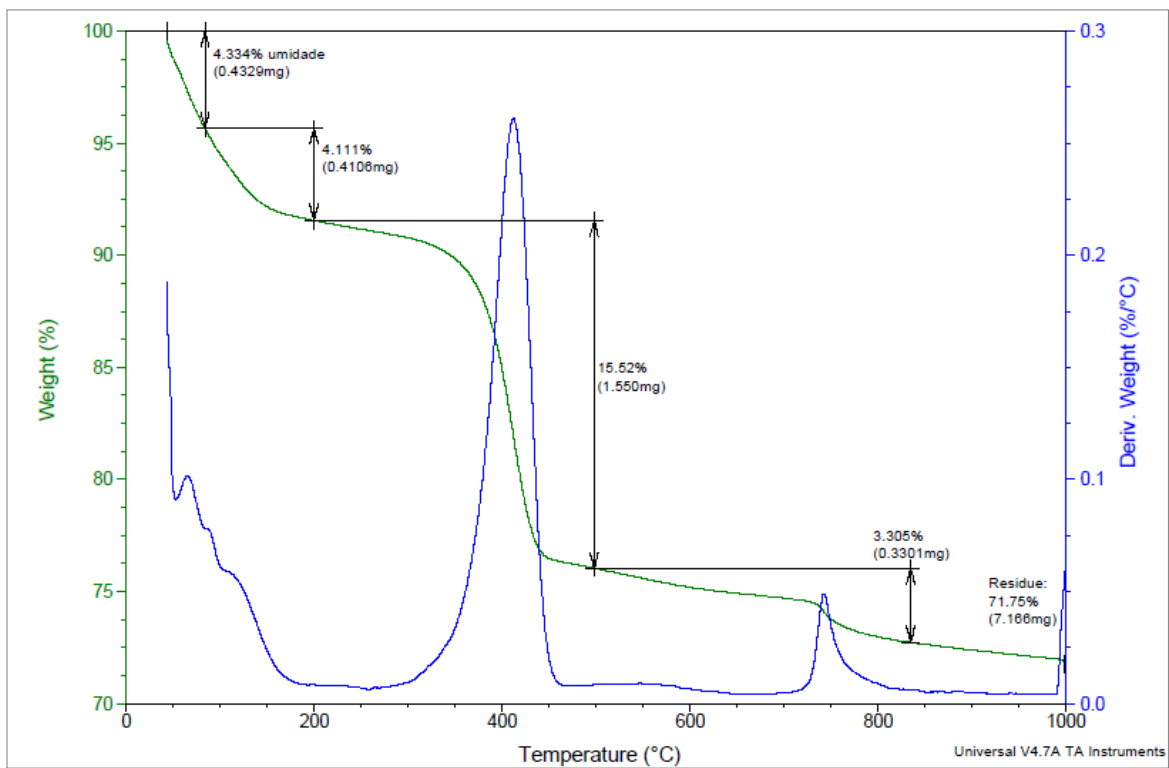

**Figure S1.** TGA thermogram for ILT<sub>2</sub>NM<sub>50</sub>.

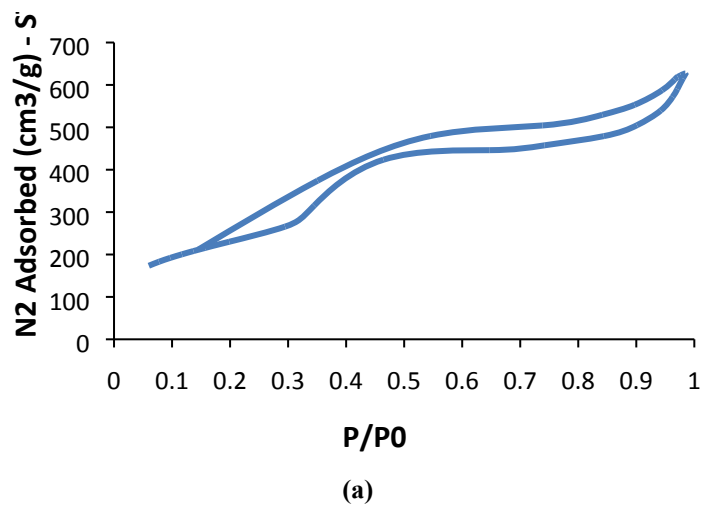

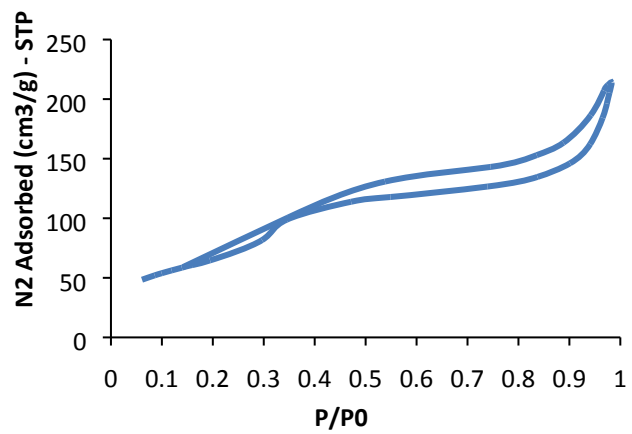

(b)

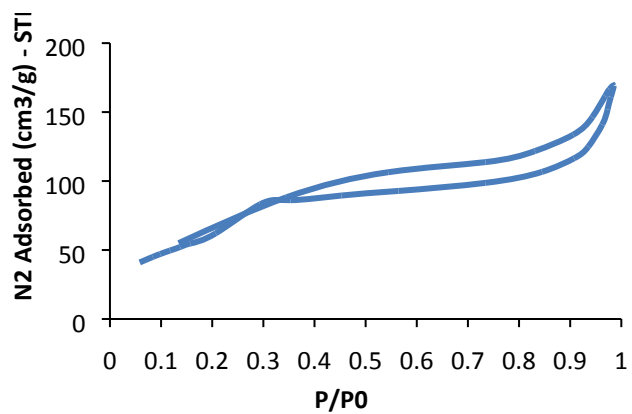

(c)

**Figure S2.** N<sub>2</sub> adsorption-desorption isotherms at 77 K on different samples. MCM-41 with 45.24 Å pores (a); ILCLM50 with 53.07 Å pores (b); and ILTF2NM50 with 42.62 Å pores (c).
